# Supplementary material
Source: Springer Nature journal article supplement (https://www.springermedizin.de/resource/supplementary/12877_2014_1038_MOESM3_ESM.pdf/9440684)

**a.**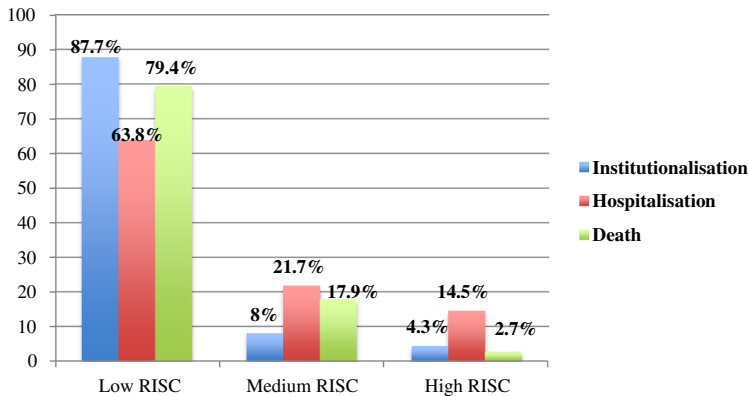**b.**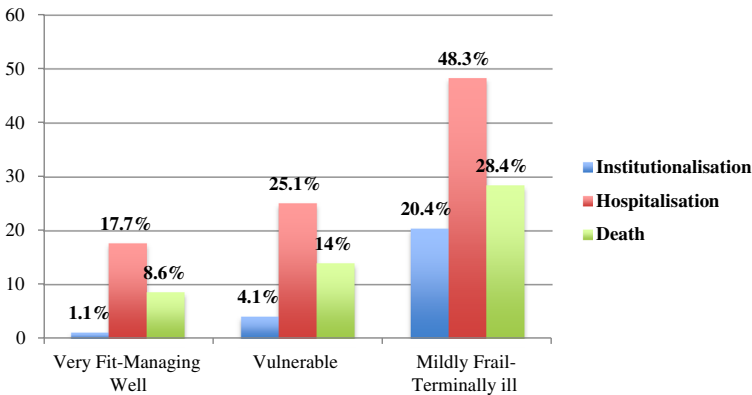

Supplement: MOESM3 [file 9440684]
